# Supplementary material
Source: PubMed Central journal article supplement (PMC4554550)
Supplement: Supp_Fig1.pdf [file Supp_Fig1.pdf]

## Supplementary Data

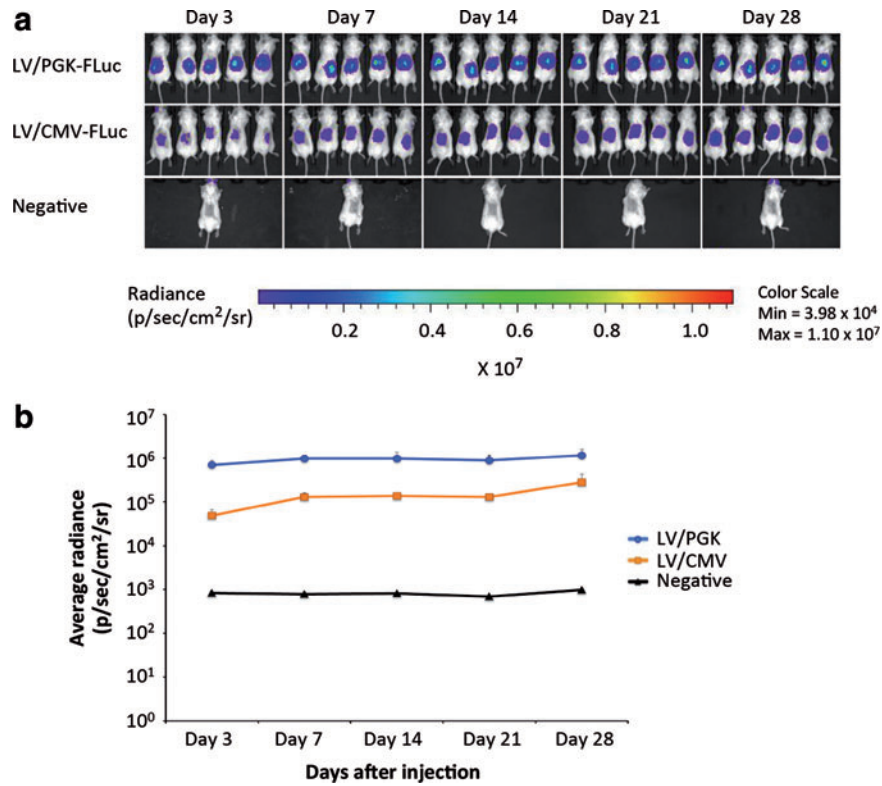

**Supplementary Figure S1.** *In vivo* detection of PGK- and CMV-driven luciferase reporter after intradermal injections of LV vectors into xenografted human skin. **(a)** Representative images from days 3, 7, 14, 21, and 28 of xenotransplanted mice in groups injected intradermally with LV/PGK-FLuc or LV/CMV-FLuc. A saline-injected negative control mouse is shown in the lower panels. **(b)** Bioluminescence from injected xenografted human skin was recorded on days 3, 7, 14, 21, and 28, and the results are based on the signal intensity computed from a standardized region of interest (depicted as the average radiance + SD). LV, lentiviral vector; p/sec/cm<sup>2</sup>/sr, photons per second per centimeter squared per steradian.
