# Supplementary material
Source: PubMed Central journal article supplement (PMC4554550)
Supplement: Supp_Fig2.pdf [file Supp_Fig2.pdf]

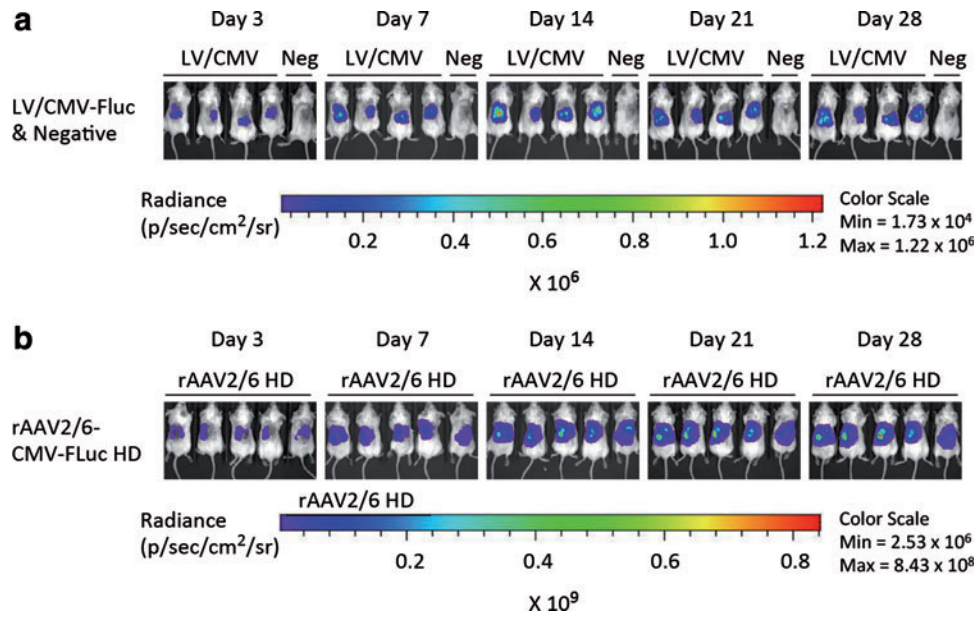

**Supplementary Figure S2.** *In vivo* detection of bioluminescence after intradermal injections of LV/CMV-FLuc and high-dose rAAV2/6-CMV-FLuc into xenografted human skin. **(a)** Representative images from days 3, 7, 14, 21, and 28 of xenotransplanted mice in groups injected intradermally with LV/CMV-FLuc (mice 1–4) at a vector dose equal to previous experiments and negative control (mouse 5). **(b)** Same as **(a)**, but mice were injected with a 5-fold increased dose of rAAV2/6-CMV-FLuc as compared with previous experiments. LV, lentiviral vector; rAAV, recombinant adeno-associated viral vectors; HD, high dose; p/sec/cm<sup>2</sup>/sr, photons per second per centimeter squared per steradian.
