# Supplementary material
Source: PubMed Central journal article supplement (PMC4554550)
Supplement: Supp_Fig3.pdf [file Supp_Fig3.pdf]

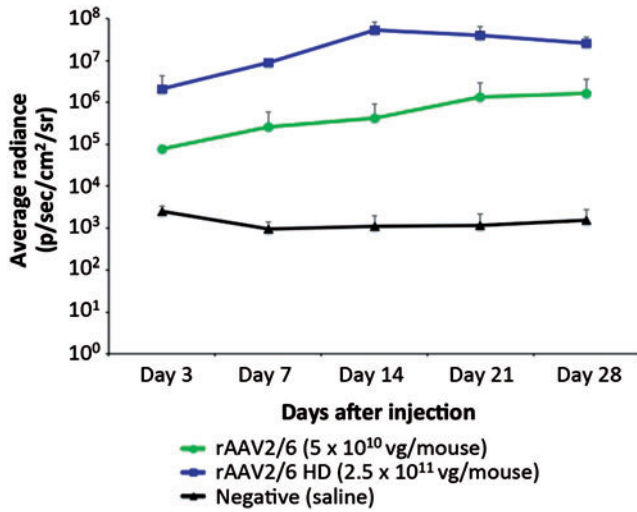

**Supplementary Figure S3.** Luciferase activity *in vivo* increases as a result of increased rAAV2/6-CMV-FLuc vector dose. Shown is *in vivo* imaging of luciferase activity after intradermal vector administration. Bioluminescence from injected xenografted human skin was recorded on days 3, 7, 14, 21, and 28 of xenotransplanted mice in groups injected intradermally with rAAV2/6-CMV-FLuc ( $5 \times 10^{10}$  VG/mouse,  $n=4$ ), rAAV2/6-CMV-FLuc HD ( $2.5 \times 10^{11}$  VG/mouse,  $n=5$ ), or negative control ( $n=5$ ). The results are based on the signal intensity computed from a standardized region of interest (depicted as the average radiance + SD). LV, lentiviral vector; rAAV, recombinant adeno-associated viral vectors; HD, high dose; p/sec/cm<sup>2</sup>/sr, photons per second per centimeter squared per steradian.
