# Supplementary material
Source: PubMed Central journal article supplement (PMC4554550)
Supplement: Supp_Fig4.pdf [file Supp_Fig4.pdf]

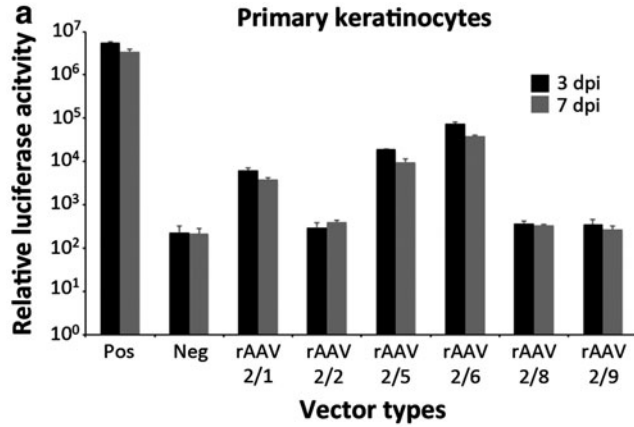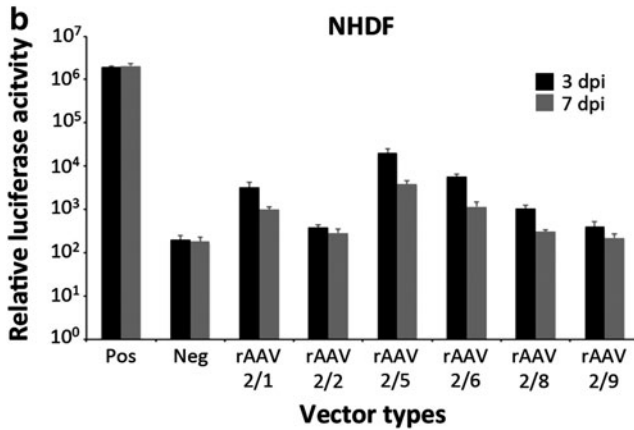

**Supplementary Figure S4.** *In vitro* transduction of human skin-derived cells by rAAV vector serotype 1, 2, 5, 6, 8, or 9. Shown are (a) primary human keratinocytes and (b) NHDF cells transduced with rAAV2/1-CMV-FLuc, rAAV2/2-CMV-FLuc, rAAV2/5-CMV-FLuc, rAAV2/6-CMV-FLuc, rAAV2/8-CMV-FLuc, or rAAV2/9-CMV-FLuc (MOI,  $\sim 1 \times 10^5$  VG/cell). Cells transduced with LV/PGK-FLuc and untransduced cells were included as positive and negative assay controls, respectively. Relative luciferase activity was determined 3 days (solid columns) and 7 days (shaded columns) post-infection. All transductions were performed in triplicate. NHDF, normal human dermal fibroblasts; dpi, days postinfection. Data are presented as means + SD.
